# Supplementary material for: A contemporary reassessment of the enhanced transient expression system based on the tombusviral silencing suppressor protein P19
Source: PubMed Central journal article supplement (PMC10107623; doi:10.1111/tpj.16032), 2022-12-14
Supplement: TPJ-113-186-s002.pdf [file TPJ-113-186-s002.pdf]

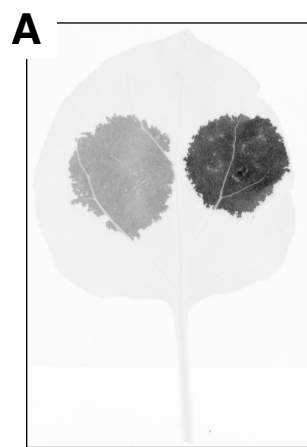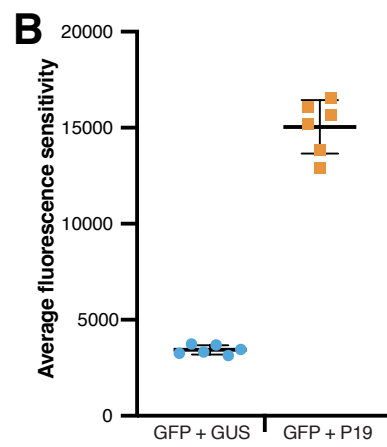

**SUPPLEMENTARY FIGURE 1**

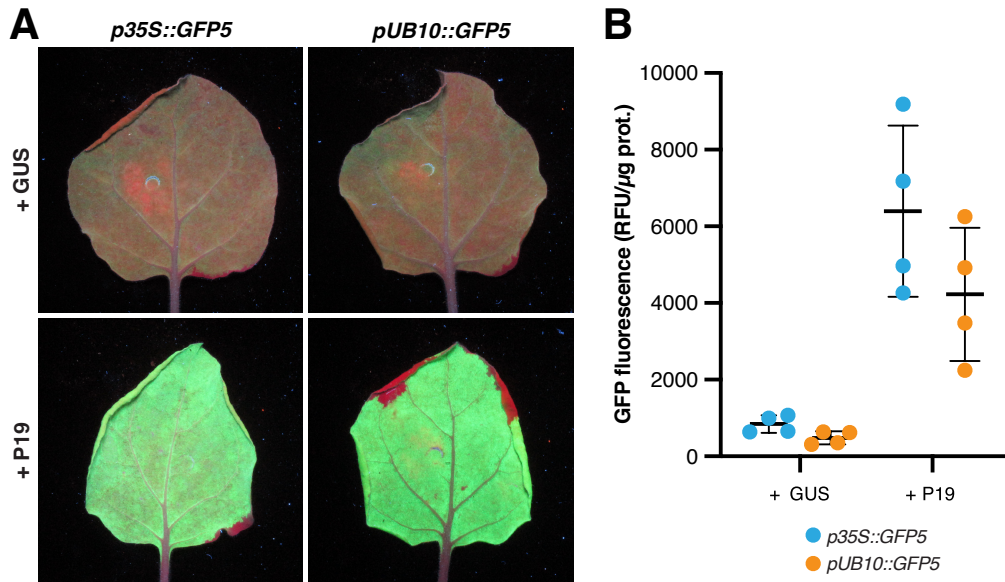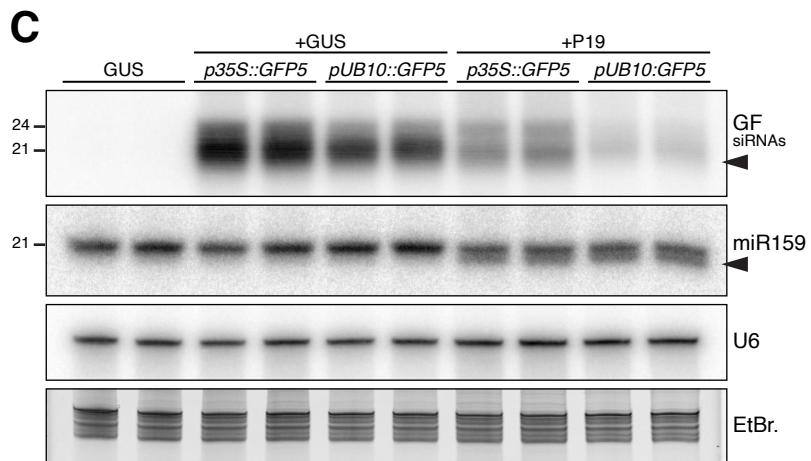

**SUPPLEMENTARY FIGURE 2**

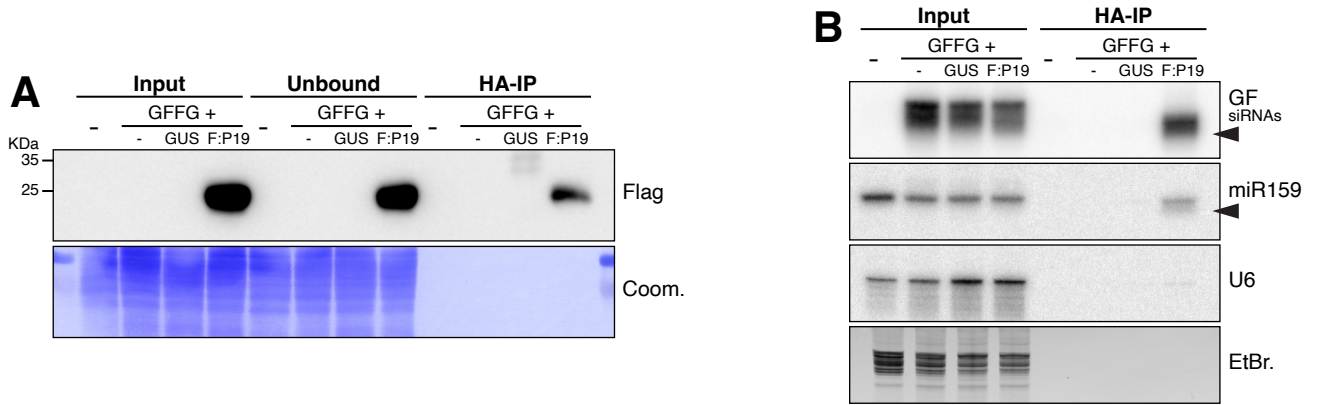

**SUPPLEMENTARY FIGURE 3**

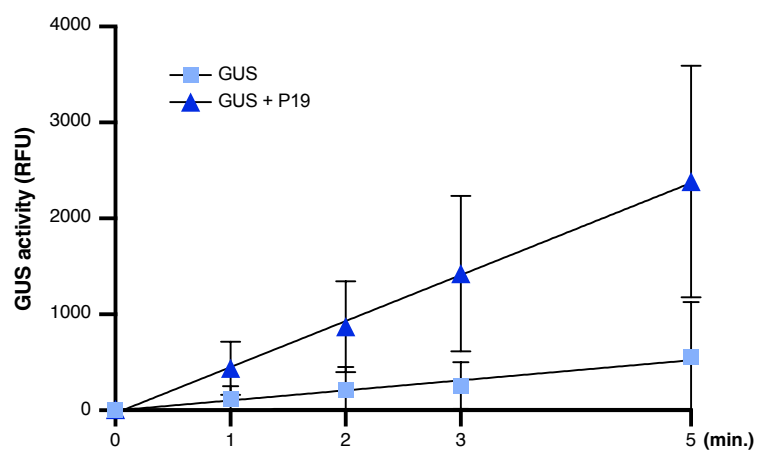

**SUPPLEMENTARY FIGURE 4**

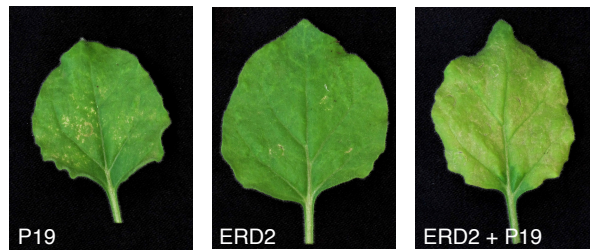

**SUPPLEMENTARY FIGURE 5**

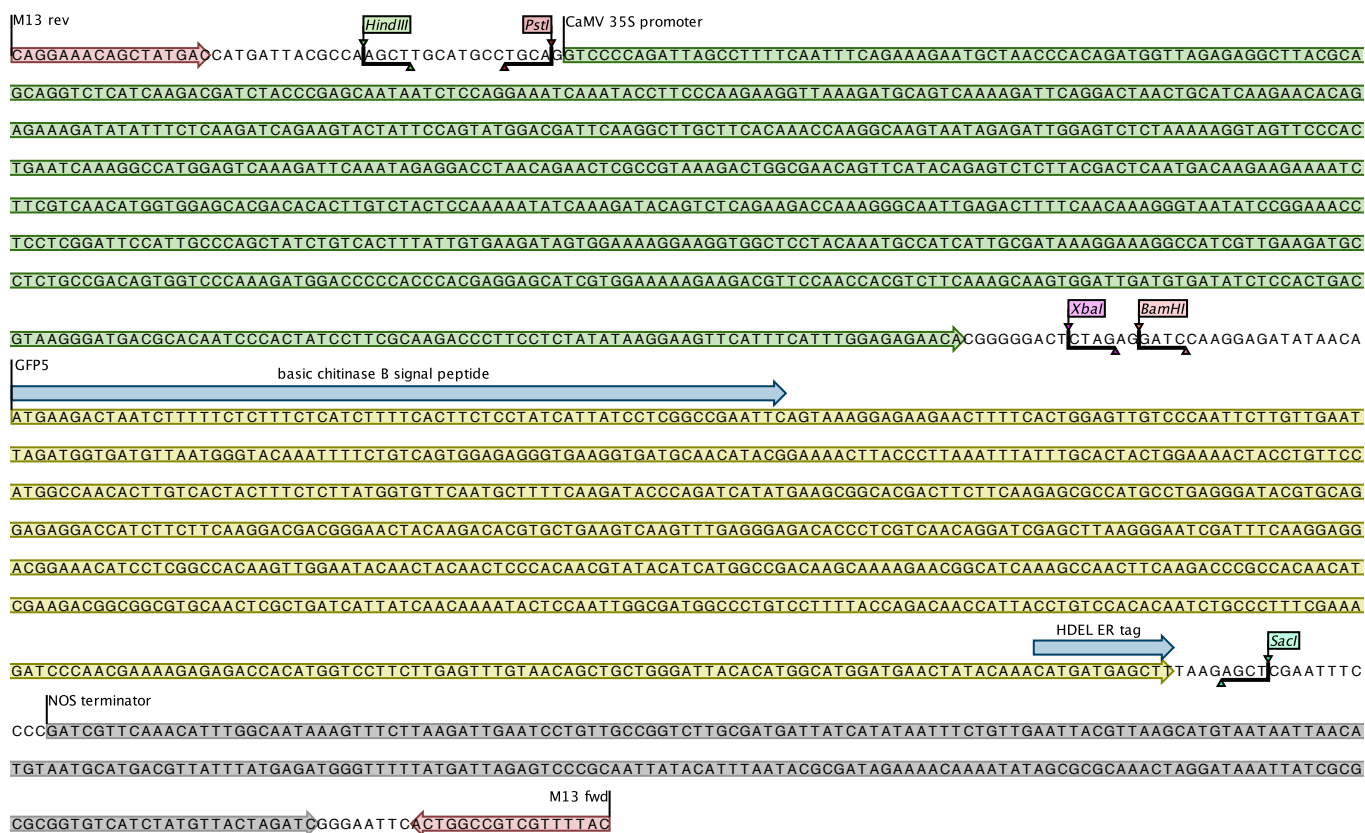

**SUPPLEMENTARY FIGURE 6**
